# Supplementary material for: Associations between concussion and risk of diagnosis of psychological and neurological disorders: a retrospective population-based cohort study
Source: PubMed Central journal article supplement — Fam Med Community Health. 2020 Jul 27;8(3):e000390. doi: 10.1136/fmch-2020-000390 (PMC7388873; doi:10.1136/fmch-2020-000390), 2020-07-27
Supplement: fmch-2020-000390supp001.pdf [file fmch-2020-000390supp001.pdf]

1 **Appendix 1: Supplementary methods**

2

3 Table S1. International Classification of Diseases codes for attention-deficit hyperactivity  
4 disorder

5 Table S2. International Classification of Diseases codes for mood and anxiety disorders

6 Table S3. International Classification of Diseases codes for dementia

7 Table S4. International Classification of Diseases codes for Parkinson's disease

| <b>Table S1. International Classification of Diseases codes for attention-deficit hyperactivity disorder</b>            |                                   |
|-------------------------------------------------------------------------------------------------------------------------|-----------------------------------|
| <b>One or more hospitalizations with a diagnosis of hyperkinetic syndrome</b>                                           |                                   |
| <b>ICD-9-CM</b>                                                                                                         | <b>ICD-10-CA</b>                  |
| 314                                                                                                                     | F90                               |
| <b>One or more physician visits with a diagnosis of hyperkinetic syndrome</b>                                           |                                   |
| <b>ICD-9-CM</b>                                                                                                         |                                   |
| 314                                                                                                                     |                                   |
| <b>Two or more prescriptions for ADHD drugs without a diagnosis of:</b>                                                 |                                   |
| <b>Conduct disorder</b>                                                                                                 |                                   |
| <b>ICD-9-CM</b>                                                                                                         | <b>ICD-10-CA</b>                  |
| 312                                                                                                                     | F63                               |
|                                                                                                                         | F91                               |
|                                                                                                                         | F92                               |
| <b>Disturbance of emotions</b>                                                                                          |                                   |
| <b>ICD-9-CM</b>                                                                                                         | <b>ICD-10-CA</b>                  |
| 313                                                                                                                     | F93                               |
|                                                                                                                         | F94                               |
| <b>Cataplexy/narcolepsy</b>                                                                                             |                                   |
| <b>ICD-9-CM</b>                                                                                                         | <b>ICD-10-CA</b>                  |
| 347                                                                                                                     | G47.4                             |
| <b>One prescription for ADHD drugs in one year and a diagnosis of hyperkinetic syndrome in the previous three years</b> |                                   |
| <b>ADHD medications were identified by</b>                                                                              |                                   |
| <b>ATC code</b>                                                                                                         | <b>Drug class/name</b>            |
| N06BA                                                                                                                   | Centrally acting sympathomimetics |
| <b>ICD-9-CM, International Classification of Diseases, Ninth Revision, Clinical Modification.</b>                       |                                   |
| <b>ICD-10-CA, International Classification of Diseases, Tenth Revision, Canada.</b>                                     |                                   |

| <b>Table S2. International Classification of Diseases codes for mood and anxiety disorders</b>                                                |                  |
|-----------------------------------------------------------------------------------------------------------------------------------------------|------------------|
| <b>One or more hospitalizations with a diagnosis for depressive disorder, affective psychoses, neurotic depression or adjustment reaction</b> |                  |
| <b>ICD-9-CM</b>                                                                                                                               | <b>ICD-10-CA</b> |
| 296.1-296.8                                                                                                                                   | F31              |
| 300.4                                                                                                                                         | F32              |
| 309                                                                                                                                           | F33              |
| 311                                                                                                                                           | F34.1            |
|                                                                                                                                               | F38.0            |
|                                                                                                                                               | F38.1            |
|                                                                                                                                               | F41.2            |
|                                                                                                                                               | F43.1            |
|                                                                                                                                               | F43.2            |
|                                                                                                                                               | F43.8            |
|                                                                                                                                               | F53.0            |
|                                                                                                                                               | F93.0            |
| <b>One or more hospitalizations with a diagnosis for an anxiety state, phobic disorders, or obsessive-compulsive disorders</b>                |                  |
| <b>ICD-9-CM</b>                                                                                                                               | <b>ICD-10-CA</b> |
| 300                                                                                                                                           | F40              |
| 300.2                                                                                                                                         | F41.0            |
| 300.3                                                                                                                                         | F41.1            |
| 300.7                                                                                                                                         | F41.3            |
|                                                                                                                                               | F41.8            |
|                                                                                                                                               | F41.9            |
|                                                                                                                                               | F42              |
|                                                                                                                                               | F45.2            |
| <b>One or more hospitalizations with a diagnosis for anxiety disorders</b>                                                                    |                  |
| <b>ICD-9-CM</b>                                                                                                                               | <b>ICD-10-CA</b> |
| 300                                                                                                                                           | F32              |
|                                                                                                                                               | F34.1            |
|                                                                                                                                               | F40              |
|                                                                                                                                               | F41              |
|                                                                                                                                               | F42              |
|                                                                                                                                               | F44              |
|                                                                                                                                               | F45.0            |
|                                                                                                                                               | F45.1            |
|                                                                                                                                               | F45.2            |
|                                                                                                                                               | F48              |
|                                                                                                                                               | F68.0            |
|                                                                                                                                               | F99              |

| <b>Table S2. International Classification of Diseases codes for mood and anxiety disorders (continued)</b> |                                       |
|------------------------------------------------------------------------------------------------------------|---------------------------------------|
| <b>and one or more prescriptions for an antidepressant or mood stabilizer</b>                              |                                       |
| <b>ATC code</b>                                                                                            | <b>Drug class/name</b>                |
| N05AN01                                                                                                    | Lithium                               |
| N05BA                                                                                                      | Benzodiazepine derivative anxiolytics |
| <b>and one or more prescriptions for an antidepressant or mood stabilizer</b>                              |                                       |
| <b>ATC code</b>                                                                                            | <b>Drug class/name</b>                |
| N06A                                                                                                       | Antidepressants                       |
| <b>One or more physician visits with a diagnosis for depressive disorder or affective psychoses</b>        |                                       |
| <b>ICD-9-CM</b>                                                                                            |                                       |
| 296                                                                                                        |                                       |
| 311                                                                                                        |                                       |
| <b>One or more physician visits with a diagnosis for anxiety disorders</b>                                 |                                       |
| <b>ICD-9-CM</b>                                                                                            |                                       |
| 300                                                                                                        |                                       |
| <b>and one or more prescriptions for an antidepressant or mood stabilizer</b>                              |                                       |
| <b>ATC code</b>                                                                                            | <b>Drug class/name</b>                |
| N05AN01                                                                                                    | Lithium                               |
| N05BA                                                                                                      | Centrally acting sympathomimetics     |
| N06A                                                                                                       | Antidepressants                       |
| <b>Three or more physician visits with a diagnosis for anxiety disorders or adjustment reaction</b>        |                                       |
| <b>ICD-9-CM</b>                                                                                            |                                       |
| 300                                                                                                        |                                       |
| 309                                                                                                        |                                       |
| <b>ICD-9-CM, International Classification of Diseases, Ninth Revision, Clinical Modification.</b>          |                                       |
| <b>ICD-10-CA, International Classification of Diseases, Tenth Revision, Canada.</b>                        |                                       |

| <b>Table S3. International Classification of Diseases codes for dementia</b>                                                                   |                  |
|------------------------------------------------------------------------------------------------------------------------------------------------|------------------|
| <b>One or more hospitalizations with a diagnosis for dementia, including organic psychotic conditions, cerebral degenerations and senility</b> |                  |
| <b>ICD-9-CM</b>                                                                                                                                | <b>ICD-10-CA</b> |
| 290                                                                                                                                            | F00              |
| 291.1                                                                                                                                          | F01              |
| 291.2                                                                                                                                          | F02              |
| 292.82                                                                                                                                         | F03              |
| 294                                                                                                                                            | F04              |
| 331                                                                                                                                            | F05.1            |
| 797                                                                                                                                            | F06.5            |
|                                                                                                                                                | F06.6            |
|                                                                                                                                                | F06.8            |
|                                                                                                                                                | F06.9            |
|                                                                                                                                                | F09              |
|                                                                                                                                                | F10.7            |
|                                                                                                                                                | F11.7            |
|                                                                                                                                                | F12.7            |
|                                                                                                                                                | F13.7            |
|                                                                                                                                                | F14.7            |
|                                                                                                                                                | F15.7            |
|                                                                                                                                                | F16.7            |
|                                                                                                                                                | F17.7            |
|                                                                                                                                                | F18.7            |
|                                                                                                                                                | F19.7            |
|                                                                                                                                                | G30              |
|                                                                                                                                                | G31.0            |
|                                                                                                                                                | G31.1            |
|                                                                                                                                                | G31.9            |
|                                                                                                                                                | G32.8            |
|                                                                                                                                                | G91              |
|                                                                                                                                                | G93.7            |
|                                                                                                                                                | G94              |
|                                                                                                                                                | R54              |
|                                                                                                                                                |                  |
| <b>One or more physician visits with a diagnosis for dementia</b>                                                                              |                  |
| <b>ICD-9-CM</b>                                                                                                                                |                  |
| 290                                                                                                                                            |                  |
| 294                                                                                                                                            |                  |
| 331                                                                                                                                            |                  |
| 797                                                                                                                                            |                  |

| <b>Table S3. International Classification of Diseases codes for dementia (continued)</b>          |                        |
|---------------------------------------------------------------------------------------------------|------------------------|
| <b>One or more prescriptions for anti-dementia drugs</b>                                          |                        |
| <b>ATC code</b>                                                                                   | <b>Drug class/name</b> |
| N06DA                                                                                             | Anticholinesterases    |
| N06DX01                                                                                           | Memantine              |
| <b>ICD-9-CM, International Classification of Diseases, Ninth Revision, Clinical Modification.</b> |                        |
| <b>ICD-10-CA, International Classification of Diseases, Tenth Revision, Canada.</b>               |                        |

10

11

| <b>Table S4. International Classification of Diseases codes for Parkinson's disease</b>           |                        |
|---------------------------------------------------------------------------------------------------|------------------------|
| <b>One or more hospitalizations with a diagnosis for Parkinson's disease</b>                      |                        |
| <b>ICD-9-CM</b>                                                                                   | <b>ICD-10-CA</b>       |
| 332                                                                                               | G20                    |
| <b>One or more physician visits with a diagnosis for Parkinson's disease</b>                      |                        |
| <b>ICD-9-CM</b>                                                                                   |                        |
| 332                                                                                               |                        |
| <b>One or more prescriptions for anti-Parkinson's drugs</b>                                       |                        |
| <b>ATC code</b>                                                                                   | <b>Drug class/name</b> |
| N04B                                                                                              | Dopaminergic agents    |
| <b>ICD-9-CM, International Classification of Diseases, Ninth Revision, Clinical Modification.</b> |                        |
| <b>ICD-10-CA, International Classification of Diseases, Tenth Revision, Canada.</b>               |                        |

12
