# Supplementary material for: Associations between concussion and risk of diagnosis of psychological and neurological disorders: a retrospective population-based cohort study
Source: PubMed Central journal article supplement — Fam Med Community Health. 2020 Jul 27;8(3):e000390. doi: 10.1136/fmch-2020-000390 (PMC7388873; doi:10.1136/fmch-2020-000390), 2020-07-27
Supplement: fmch-2020-000390supp002.pdf [file fmch-2020-000390supp002.pdf]

**1 Appendix 2: Supplementary results**

2

3 Table S5. Number of matched controls to cases of concussion

4 Table S6. Number of individuals with 1, 2, or 3+ concussions

5 Table S7. Number of diagnoses by age at incident concussion

6 Table S8. Hazard ratios for outcomes of interest with exposure to 3+ concussions compared to 1  
7 concussion8 Table S9. Average time in years to follow-up diagnosis for attention-deficit hyperactivity  
9 disorder (ADHD)10 Table S10. Average time in years to follow-up diagnosis for mood and anxiety disorders  
11 (MADs)

12 Table S11. Average time in years to follow-up diagnosis for dementia

13 Table S12. Average time in years to follow-up diagnosis for Parkinson's disease

14 Table S13. Number of diagnoses of attention-deficit hyperactivity disorder by fiscal year

15 Table S14. Number of diagnoses of mood and anxiety disorders by fiscal year

16 Table S15. Number of diagnoses of dementia by fiscal year

17 Table S16. Number of diagnoses of Parkinson's disease by fiscal year

18 Table S17. Hazard ratios for concussion-induced risk of conditions of interest by age at incident  
19 concussion20 Table S18. Hazard ratios for outcomes of interest with year of incident concussion diagnosis  
21 <1998 and  $\geq$ 1998

22

23

|          | <b>N (47483)</b> | <b>Percent (%)</b> |
|----------|------------------|--------------------|
| <b>1</b> | 583              | 1                  |
| <b>2</b> | 2253             | 5                  |
| <b>3</b> | 44647            | 94                 |

24

|          | <b>N (47483)</b> | <b>Percent (%)</b> |
|----------|------------------|--------------------|
| <b>1</b> | 42624            | 90                 |
| <b>2</b> | 3887             | 8                  |
| <b>3</b> | 972              | 2                  |

| <b>Table S7. Number of diagnoses by age at incident concussion</b> |                  |                 |                   |                 |
|--------------------------------------------------------------------|------------------|-----------------|-------------------|-----------------|
| <b>Age-group, y</b>                                                | <b>Control</b>   |                 | <b>Concussion</b> |                 |
| <b>ADHD</b>                                                        | <b>Diagnosis</b> | <b>Censored</b> | <b>Diagnosis</b>  | <b>Censored</b> |
| <b>0 to 9</b>                                                      | 1506             | 19168           | 835               | 6128            |
| <b>10 to 19</b>                                                    | 2343             | 48225           | 1074              | 16280           |
| <b>20 to 29</b>                                                    | 225              | 20026           | 170               | 6720            |
| <b>30 to 39</b>                                                    | 139              | 14597           | 83                | 4899            |
| <b>40 to 49</b>                                                    | 76               | 12472           | 60                | 4147            |
| <b>50 to 59</b>                                                    | 45               | 8884            | 32                | 3014            |
| <b>60 to 69</b>                                                    | 25               | 5475            | 11                | 1866            |
| <b>70 to 79</b>                                                    | 12               | 3568            | *                 | 1255            |
| <b>80 to 89</b>                                                    | 8                | 2014            | *                 | 779             |
| <b>90+</b>                                                         | *                | 221             | *                 | 127             |
| <b>Mood and anxiety disorders</b>                                  |                  |                 |                   |                 |
| <b>0 to 9</b>                                                      | 2463             | 18211           | 1376              | 5587            |
| <b>10 to 19</b>                                                    | 9316             | 41252           | 4613              | 12741           |
| <b>20 to 29</b>                                                    | 4540             | 15711           | 2879              | 4011            |
| <b>30 to 39</b>                                                    | 4121             | 10615           | 2595              | 2387            |
| <b>40 to 49</b>                                                    | 3645             | 8903            | 2150              | 2057            |
| <b>50 to 59</b>                                                    | 2486             | 6443            | 1419              | 1627            |
| <b>60 to 69</b>                                                    | 1456             | 4044            | 786               | 1091            |
| <b>70 to 79</b>                                                    | 1115             | 2465            | 550               | 708             |
| <b>80 to 89</b>                                                    | 606              | 1416            | 285               | 494             |
| <b>90+</b>                                                         | 53               | 169             | 26                | 101             |
| <b>Dementia</b>                                                    |                  |                 |                   |                 |
| <b>0 to 9</b>                                                      | 24               | 20650           | 18                | 6945            |
| <b>10 to 19</b>                                                    | 132              | 50436           | 63                | 17291           |
| <b>20 to 29</b>                                                    | 83               | 20168           | 85                | 6805            |
| <b>30 to 39</b>                                                    | 107              | 14629           | 92                | 4890            |
| <b>40 to 49</b>                                                    | 166              | 12382           | 145               | 4062            |
| <b>50 to 59</b>                                                    | 251              | 8678            | 167               | 2879            |
| <b>60 to 69</b>                                                    | 427              | 5073            | 295               | 1582            |
| <b>70 to 79</b>                                                    | 791              | 2789            | 431               | 827             |
| <b>80 to 89</b>                                                    | 682              | 1340            | 362               | 417             |
| <b>90+</b>                                                         | 88               | 134             | 64                | 63              |

**Table S7. Number of diagnoses by age at incident concussion (continued)**

| Parkinson's disease |     |       |     |       |
|---------------------|-----|-------|-----|-------|
| <b>0 to 9</b>       | *   | 20673 | *   | 6963  |
| <b>10 to 19</b>     | 36  | 50532 | 28  | 17326 |
| <b>20 to 29</b>     | 83  | 20168 | 54  | 6836  |
| <b>30 to 39</b>     | 126 | 14610 | 104 | 4878  |
| <b>40 to 49</b>     | 169 | 12379 | 110 | 4097  |
| <b>50 to 59</b>     | 147 | 8782  | 84  | 2962  |
| <b>60 to 69</b>     | 178 | 5322  | 98  | 1779  |
| <b>70 to 79</b>     | 160 | 3420  | 92  | 1166  |
| <b>80 to 89</b>     | 79  | 1943  | 30  | 749   |
| <b>90+</b>          | *   | 218   | *   | 124   |

ADHD, attention-deficit hyperactivity disorder. \* Denotes  $\leq 5$  cases.

25  
26

**Table S8. Hazard ratios for outcomes of interest with exposure to 3+ concussions compared to 1 concussion**

|                                   | Model a          |                 | Model b          |                 |
|-----------------------------------|------------------|-----------------|------------------|-----------------|
|                                   | HR (95% CI)      | <i>p</i> -value | HR (95% CI)      | <i>p</i> -value |
| <b>ADHD</b>                       | 1.10 (0.63-1.94) | 0.73            | 1.12 (0.64-1.97) | 0.70            |
| <b>Mood and anxiety disorders</b> | 1.21 (1.00-1.45) | 0.05            | 1.22 (1.01-1.47) | 0.04            |
| <b>Dementia</b>                   | 1.94 (1.06-3.55) | 0.03            | 1.95 (1.07-3.56) | 0.03            |
| <b>Parkinson's disease</b>        | 3.23 (1.61-6.48) | 0.001           | 3.27 (1.63-6.59) | <.001           |

Model a, Cox proportional hazard ratio adjusted for age, sex, and geographic location via cluster analysis. Model b, model a plus adjustment for socioeconomic status and comorbidities. HR, hazard ratio. 95% CI, 95% confidence interval. ADHD, attention-deficit hyperactivity disorder.

27  
28

**Table S9. Average time in years to follow-up diagnosis for attention-deficit hyperactivity disorder (ADHD)**

|                   | Censored      | ADHD          |
|-------------------|---------------|---------------|
|                   | Mean (95% CI) | Mean (95% CI) |
| <b>Control</b>    | 8.2 (8.1-8.2) | 3.1 (3.0-3.2) |
| <b>Concussion</b> | 9.5 (9.4-9.6) | 3.6 (3.4-3.8) |

29  
30

**Table S10. Average time in years to follow-up diagnosis for mood and anxiety disorders (MADs)**

|                   | Censored      | MADs          |
|-------------------|---------------|---------------|
|                   | Mean (95% CI) | Mean (95% CI) |
| <b>Control</b>    | 7.2 (7.1-7.2) | 4.7 (4.7-4.8) |
| <b>Concussion</b> | 8.2 (8.1-8.3) | 4.0 (4.0-4.1) |

31

| <b>Table S11. Average time in years to follow-up diagnosis for dementia</b> |                      |                      |
|-----------------------------------------------------------------------------|----------------------|----------------------|
|                                                                             | <b>Censored</b>      | <b>MADs</b>          |
|                                                                             | <b>Mean (95% CI)</b> | <b>Mean (95% CI)</b> |
| <b>Control</b>                                                              | 8.2 (8.1-8.2)        | 7.4 (7.2-7.6)        |
| <b>Concussion</b>                                                           | 9.5 (9.4-9.6)        | 6.9 (6.6-7.2)        |

32

33

| <b>Table S12. Average time in years to follow-up diagnosis for Parkinson's disease</b> |                      |                      |
|----------------------------------------------------------------------------------------|----------------------|----------------------|
|                                                                                        | <b>Censored</b>      | <b>MADs</b>          |
|                                                                                        | <b>Mean (95% CI)</b> | <b>Mean (95% CI)</b> |
| <b>Control</b>                                                                         | 8.2 (8.1-8.2)        | 7.7 (7.4-8.1)        |
| <b>Concussion</b>                                                                      | 9.5 (9.5-9.6)        | 8.0 (7.5-8.5)        |

34

| <b>Table S13. Number of diagnoses of attention-deficit hyperactivity disorder by fiscal year</b> |                |                   |
|--------------------------------------------------------------------------------------------------|----------------|-------------------|
|                                                                                                  | <b>Control</b> | <b>Concussion</b> |
| <b>1990/91</b>                                                                                   | *              | *                 |
| <b>1991/92</b>                                                                                   | 13             | 12                |
| <b>1992/93</b>                                                                                   | 29             | 15                |
| <b>1993/94</b>                                                                                   | 33             | 16                |
| <b>1994/95</b>                                                                                   | 42             | 27                |
| <b>1995/96</b>                                                                                   | 93             | 63                |
| <b>1996/97</b>                                                                                   | 87             | 52                |
| <b>1997/98</b>                                                                                   | 92             | 55                |
| <b>1998/99</b>                                                                                   | 109            | 57                |
| <b>1999/00</b>                                                                                   | 146            | 70                |
| <b>2000/01</b>                                                                                   | 128            | 66                |
| <b>2001/02</b>                                                                                   | 130            | 62                |
| <b>2002/03</b>                                                                                   | 170            | 102               |
| <b>2003/04</b>                                                                                   | 188            | 85                |
| <b>2004/05</b>                                                                                   | 192            | 105               |
| <b>2005/06</b>                                                                                   | 190            | 118               |
| <b>2006/07</b>                                                                                   | 212            | 93                |
| <b>2007/08</b>                                                                                   | 209            | 101               |
| <b>2008/09</b>                                                                                   | 207            | 102               |
| <b>2009/10</b>                                                                                   | 240            | 133               |
| <b>2010/11</b>                                                                                   | 292            | 145               |
| <b>2011/12</b>                                                                                   | 325            | 178               |
| <b>2012/13</b>                                                                                   | 409            | 177               |
| <b>2013/14</b>                                                                                   | 409            | 195               |
| <b>2014/15</b>                                                                                   | 430            | 237               |
| * Denotes $\leq 5$ cases.                                                                        |                |                   |

| <b>Table S14. Number of diagnoses of mood and anxiety disorders by fiscal year</b> |                |                   |
|------------------------------------------------------------------------------------|----------------|-------------------|
|                                                                                    | <b>Control</b> | <b>Concussion</b> |
| <b>1990/91</b>                                                                     | 84             | 94                |
| <b>1991/92</b>                                                                     | 189            | 169               |
| <b>1992/93</b>                                                                     | 264            | 215               |
| <b>1993/94</b>                                                                     | 316            | 248               |
| <b>1994/95</b>                                                                     | 425            | 313               |
| <b>1995/96</b>                                                                     | 723            | 478               |
| <b>1996/97</b>                                                                     | 683            | 439               |
| <b>1997/98</b>                                                                     | 746            | 454               |
| <b>1998/99</b>                                                                     | 926            | 545               |
| <b>1999/00</b>                                                                     | 1046           | 603               |
| <b>2000/01</b>                                                                     | 1192           | 697               |
| <b>2001/02</b>                                                                     | 1259           | 687               |
| <b>2002/03</b>                                                                     | 1365           | 746               |
| <b>2003/04</b>                                                                     | 1417           | 776               |
| <b>2004/05</b>                                                                     | 1445           | 795               |
| <b>2005/06</b>                                                                     | 1517           | 782               |
| <b>2006/07</b>                                                                     | 1582           | 846               |
| <b>2007/08</b>                                                                     | 1628           | 847               |
| <b>2008/09</b>                                                                     | 1704           | 917               |
| <b>2009/10</b>                                                                     | 1888           | 981               |
| <b>2010/11</b>                                                                     | 1923           | 995               |
| <b>2011/12</b>                                                                     | 1927           | 1055              |
| <b>2012/13</b>                                                                     | 1925           | 1055              |
| <b>2013/14</b>                                                                     | 1935           | 1033              |
| <b>2014/15</b>                                                                     | 1692           | 909               |

| <b>Table S15. Number of diagnoses of dementia by fiscal year</b> |                |                   |
|------------------------------------------------------------------|----------------|-------------------|
|                                                                  | <b>Control</b> | <b>Concussion</b> |
| <b>1990/91</b>                                                   | 6              | 10                |
| <b>1991/92</b>                                                   | 23             | 16                |
| <b>1992/93</b>                                                   | 25             | 18                |
| <b>1993/94</b>                                                   | 44             | 34                |
| <b>1994/95</b>                                                   | 45             | 27                |
| <b>1995/96</b>                                                   | 72             | 34                |
| <b>1996/97</b>                                                   | 69             | 40                |
| <b>1997/98</b>                                                   | 58             | 40                |
| <b>1998/99</b>                                                   | 81             | 49                |
| <b>1999/00</b>                                                   | 76             | 57                |
| <b>2000/01</b>                                                   | 89             | 67                |
| <b>2001/02</b>                                                   | 119            | 65                |
| <b>2002/03</b>                                                   | 115            | 79                |
| <b>2003/04</b>                                                   | 122            | 88                |
| <b>2004/05</b>                                                   | 114            | 67                |
| <b>2005/06</b>                                                   | 131            | 83                |
| <b>2006/07</b>                                                   | 138            | 91                |
| <b>2007/08</b>                                                   | 140            | 71                |
| <b>2008/09</b>                                                   | 133            | 69                |
| <b>2009/10</b>                                                   | 156            | 102               |
| <b>2010/11</b>                                                   | 188            | 108               |
| <b>2011/12</b>                                                   | 165            | 85                |
| <b>2012/13</b>                                                   | 204            | 131               |
| <b>2013/14</b>                                                   | 212            | 140               |
| <b>2014/15</b>                                                   | 226            | 151               |



| <b>Table S16. Number of diagnoses of Parkinson's disease by fiscal year</b> |                |                   |
|-----------------------------------------------------------------------------|----------------|-------------------|
|                                                                             | <b>Control</b> | <b>Concussion</b> |
| <b>1990/91</b>                                                              | *              | *                 |
| <b>1991/92</b>                                                              | *              | *                 |
| <b>1992/93</b>                                                              | *              | *                 |
| <b>1993/94</b>                                                              | 8              | *                 |
| <b>1994/95</b>                                                              | 14             | *                 |
| <b>1995/96</b>                                                              | 18             | 16                |
| <b>1996/97</b>                                                              | 17             | 10                |
| <b>1997/98</b>                                                              | 30             | 20                |
| <b>1998/99</b>                                                              | 27             | 10                |
| <b>1999/00</b>                                                              | 30             | 17                |
| <b>2000/01</b>                                                              | 41             | 15                |
| <b>2001/02</b>                                                              | 32             | 19                |
| <b>2002/03</b>                                                              | 29             | 25                |
| <b>2003/04</b>                                                              | 37             | 33                |
| <b>2004/05</b>                                                              | 56             | 26                |
| <b>2005/06</b>                                                              | 43             | 32                |
| <b>2006/07</b>                                                              | 65             | 33                |
| <b>2007/08</b>                                                              | 60             | 34                |
| <b>2008/09</b>                                                              | 65             | 32                |
| <b>2009/10</b>                                                              | 63             | 40                |
| <b>2010/11</b>                                                              | 64             | 49                |
| <b>2011/12</b>                                                              | 57             | 39                |
| <b>2012/13</b>                                                              | 78             | 42                |
| <b>2013/14</b>                                                              | 65             | 43                |
| <b>2014/15</b>                                                              | 79             | 56                |
| * Denotes $\leq 5$ cases.                                                   |                |                   |

| <b>Table S17. Hazard ratios for concussion-induced risk of outcomes of interest by age at incident concussion</b> |                    |                  |                    |                |
|-------------------------------------------------------------------------------------------------------------------|--------------------|------------------|--------------------|----------------|
|                                                                                                                   | <b>Model a</b>     |                  | <b>Model b</b>     |                |
|                                                                                                                   | <b>HR (95% CI)</b> | <b>p-value</b>   | <b>HR (95% CI)</b> | <b>p-value</b> |
| <b>ADHD</b>                                                                                                       |                    |                  |                    |                |
| 0-9 years                                                                                                         | 1.48 (1.36-1.61)   | <.001            | 1.46 (1.34-1.59)   | <.001          |
| 10-19 years                                                                                                       | 1.28 (1.19-1.37)   |                  | 1.28 (1.19-1.37)   |                |
| 20-29 years                                                                                                       | 1.81 (1.48-2.22)   |                  | 1.78 (1.45-2.19)   |                |
| 30-39 years                                                                                                       | 1.56 (1.18-2.06)   | 0.002            | 1.56 (1.18-2.07)   | 0.002          |
| 40-49 years                                                                                                       | 2.11 (1.50-2.97)   | <.001            | 2.08 (1.47-2.93)   | <.001          |
| 50-59 years                                                                                                       | 1.92 (1.21-3.06)   | 0.006            | 1.93 (1.20-3.08)   | 0.006          |
| 60-69 years                                                                                                       | 1.03 (0.49-2.16)   | 0.94             | 1.02 (0.48-2.19)   | 0.95           |
| 70+ years                                                                                                         | 0.36 (0.10-1.28)   | 0.11             | 0.37 (0.10-1.31)   | 0.12           |
| <b>Mood and anxiety disorders</b>                                                                                 |                    |                  |                    |                |
| 0-9 years                                                                                                         | 1.39 (1.30-1.49)   | <.001            | 1.38 (1.28-1.47)   | <.001          |
| 10-19 years                                                                                                       | 1.41 (1.36-1.46)   |                  | 1.39 (1.34-1.44)   |                |
| 20-29 years                                                                                                       | 1.96 (1.87-2.06)   |                  | 1.91 (1.81-2.00)   |                |
| 30-39 years                                                                                                       | 2.28 (2.16-2.40)   |                  | 2.20 (2.09-2.32)   |                |
| 40-49 years                                                                                                       | 2.14 (2.03-2.27)   |                  | 2.09 (1.98-2.21)   |                |
| 50-59 years                                                                                                       | 1.98 (1.85-2.12)   |                  | 1.96 (1.83-2.10)   |                |
| 60-69 years                                                                                                       | 1.78 (1.62-1.95)   |                  | 1.78 (1.62-1.96)   |                |
| 70+ years                                                                                                         | 1.51 (1.38-1.65)   |                  | 1.50 (1.37-1.64)   |                |
| <b>Dementia</b>                                                                                                   |                    |                  |                    |                |
| 0-9 years                                                                                                         | 1.88 (0.99-3.57)   | 0.05             | 1.70 (0.88-3.28)   | 0.12           |
| 10-19 years                                                                                                       | 1.16 (0.85-1.57)   | 0.35             | 1.14 (0.84-1.55)   | 0.41           |
| 20-29 years                                                                                                       | 2.44 (1.79-3.32)   | <.001            | 2.32 (1.70-3.18)   | <.001          |
| 30-39 years                                                                                                       | 2.14 (1.60-2.86)   |                  | 2.05 (1.53-2.76)   |                |
| 40-49 years                                                                                                       | 2.22 (1.76-2.81)   |                  | 2.14 (1.69-2.71)   |                |
| 50-59 years                                                                                                       | 1.73 (1.40-2.13)   |                  | 1.65 (1.33-2.04)   |                |
| 60-69 years                                                                                                       | 1.82 (1.54-2.15)   |                  | 1.82 (1.54-2.16)   |                |
| 70+ years                                                                                                         | 1.64 (1.49-1.81)   | 1.62 (1.47-1.79) |                    |                |
| <b>Parkinson's disease</b>                                                                                        |                    |                  |                    |                |
| 0-9 years                                                                                                         | N/A                | N/A              | N/A                | N/A            |
| 10-19 years                                                                                                       | 1.63 (0.96-2.78)   | 0.07             | 1.59 (0.93-2.72)   | 0.09           |
| 20-29 years                                                                                                       | 1.44 (1.00-2.06)   | 0.05             | 1.36 (0.95-1.97)   | 0.10           |
| 30-39 years                                                                                                       | 2.17 (1.66-2.84)   | <.001            | 2.03 (1.54-2.66)   | <.001          |
| 40-49 years                                                                                                       | 1.74 (1.36-2.23)   |                  | 1.67 (1.30-2.14)   |                |
| 50-59 years                                                                                                       | 1.41 (1.07-1.87)   | 0.02             | 1.43 (1.07-1.90)   | 0.01           |
| 60-69 years                                                                                                       | 1.49 (1.15-1.95)   | 0.003            | 1.50 (1.15-1.96)   | 0.003          |
| 70+ years                                                                                                         | 1.46 (1.15-1.85)   | 0.002            | 1.44 (1.13-1.82)   | 0.003          |

**Model a**, Cox proportional hazard ratio adjusted for age, sex, and geographic location via cluster analysis. **Model b**, model a plus adjustment for socioeconomic status and comorbidities. **HR**, hazard ratio. **95% CI**, 95% confidence interval. **ADHD**, attention-deficit hyperactivity disorder.

39

| <b>Table S18. Hazard ratios for outcomes of interest with year of concussion diagnosis &lt;1998 and ≥1998</b> |                                     |                    |                       |                    |                       |
|---------------------------------------------------------------------------------------------------------------|-------------------------------------|--------------------|-----------------------|--------------------|-----------------------|
|                                                                                                               | <b>Year of concussion diagnosis</b> | <b>Model a</b>     |                       | <b>Model b</b>     |                       |
|                                                                                                               |                                     | <b>HR (95% CI)</b> | <b><i>P</i>-value</b> | <b>HR (95% CI)</b> | <b><i>P</i>-value</b> |
| <b>ADHD</b>                                                                                                   | <1998                               | 1.53 (1.37-1.70)   | 0.05                  | 1.51 (1.35-1.68)   | 0.06                  |
|                                                                                                               | ≥1998                               | 1.38 (1.30-1.46)   |                       | 1.37 (1.29-1.45)   |                       |
| <b>Mood and anxiety disorders</b>                                                                             | <1998                               | 1.61 (1.55-1.67)   | <.001                 | 1.59 (1.53-1.65)   | <.001                 |
|                                                                                                               | ≥1998                               | 1.83 (1.78-1.87)   |                       | 1.80 (1.76-1.85)   |                       |
| <b>Dementia</b>                                                                                               | <1998                               | 1.61 (1.46-1.79)   | 0.02                  | 1.59 (1.44-1.76)   | 0.03                  |
|                                                                                                               | ≥1998                               | 1.91 (1.74-2.09)   |                       | 1.87 (1.70-2.05)   |                       |
| <b>Parkinson's disease</b>                                                                                    | <1998                               | 1.45 (1.24-1.71)   | 0.06                  | 1.44 (1.22-1.69)   | 0.07                  |
|                                                                                                               | ≥1998                               | 1.76 (1.52-2.03)   |                       | 1.71 (1.48-1.98)   |                       |

**Model a**, Cox proportional hazard ratio adjusted for age, sex, and geographic location via cluster analysis. **Model b**, model a plus adjustment for socioeconomic status and comorbidities. **HR**, hazard ratio. **95% CI**, 95% confidence interval. **ADHD**, attention-deficit hyperactivity disorder.

40
